# Supplementary material
Source: publisher site journal article supplement (https://www.dovepress.com/article/supplementary_file/591353/591353%20Revised%20Supplementary%20Material.docx)
Supplement: Supplementary file 1 [file 591353%20Revised%20Supplementary%20Material.docx]

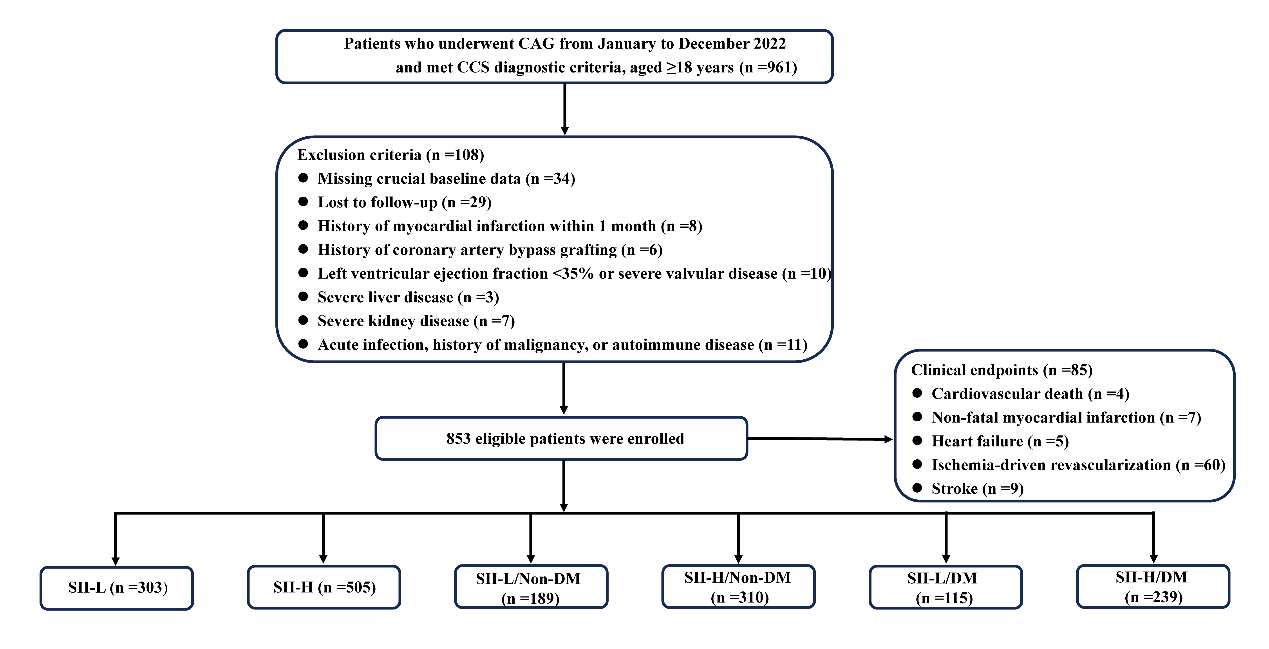


Supplementary Figure 1 The flow chart of participants in the current study


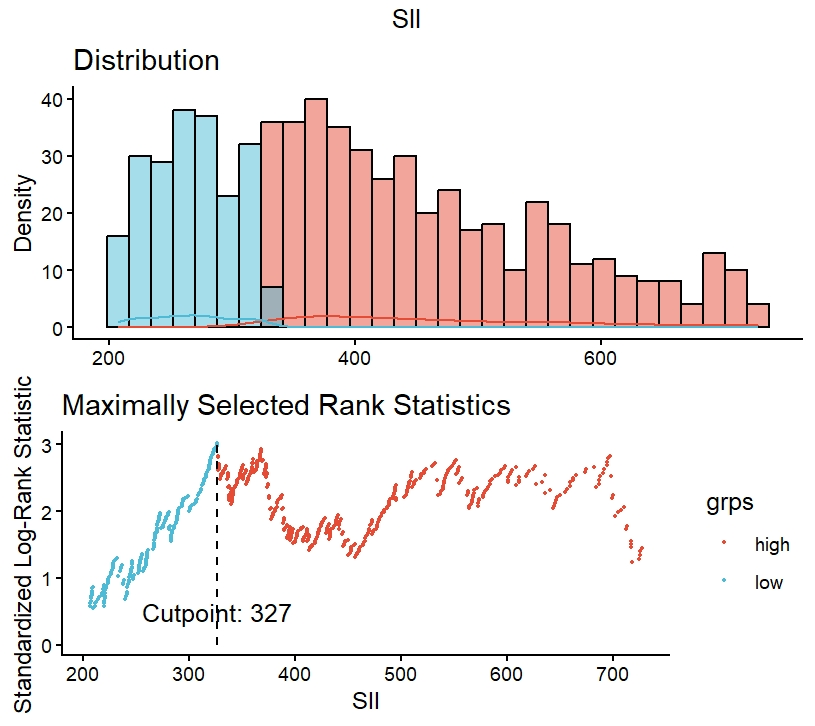


Supplementary Figure 2 The cutoff point was calculated using the maximally selected rank statistics based on the ‘maxstat’ package.


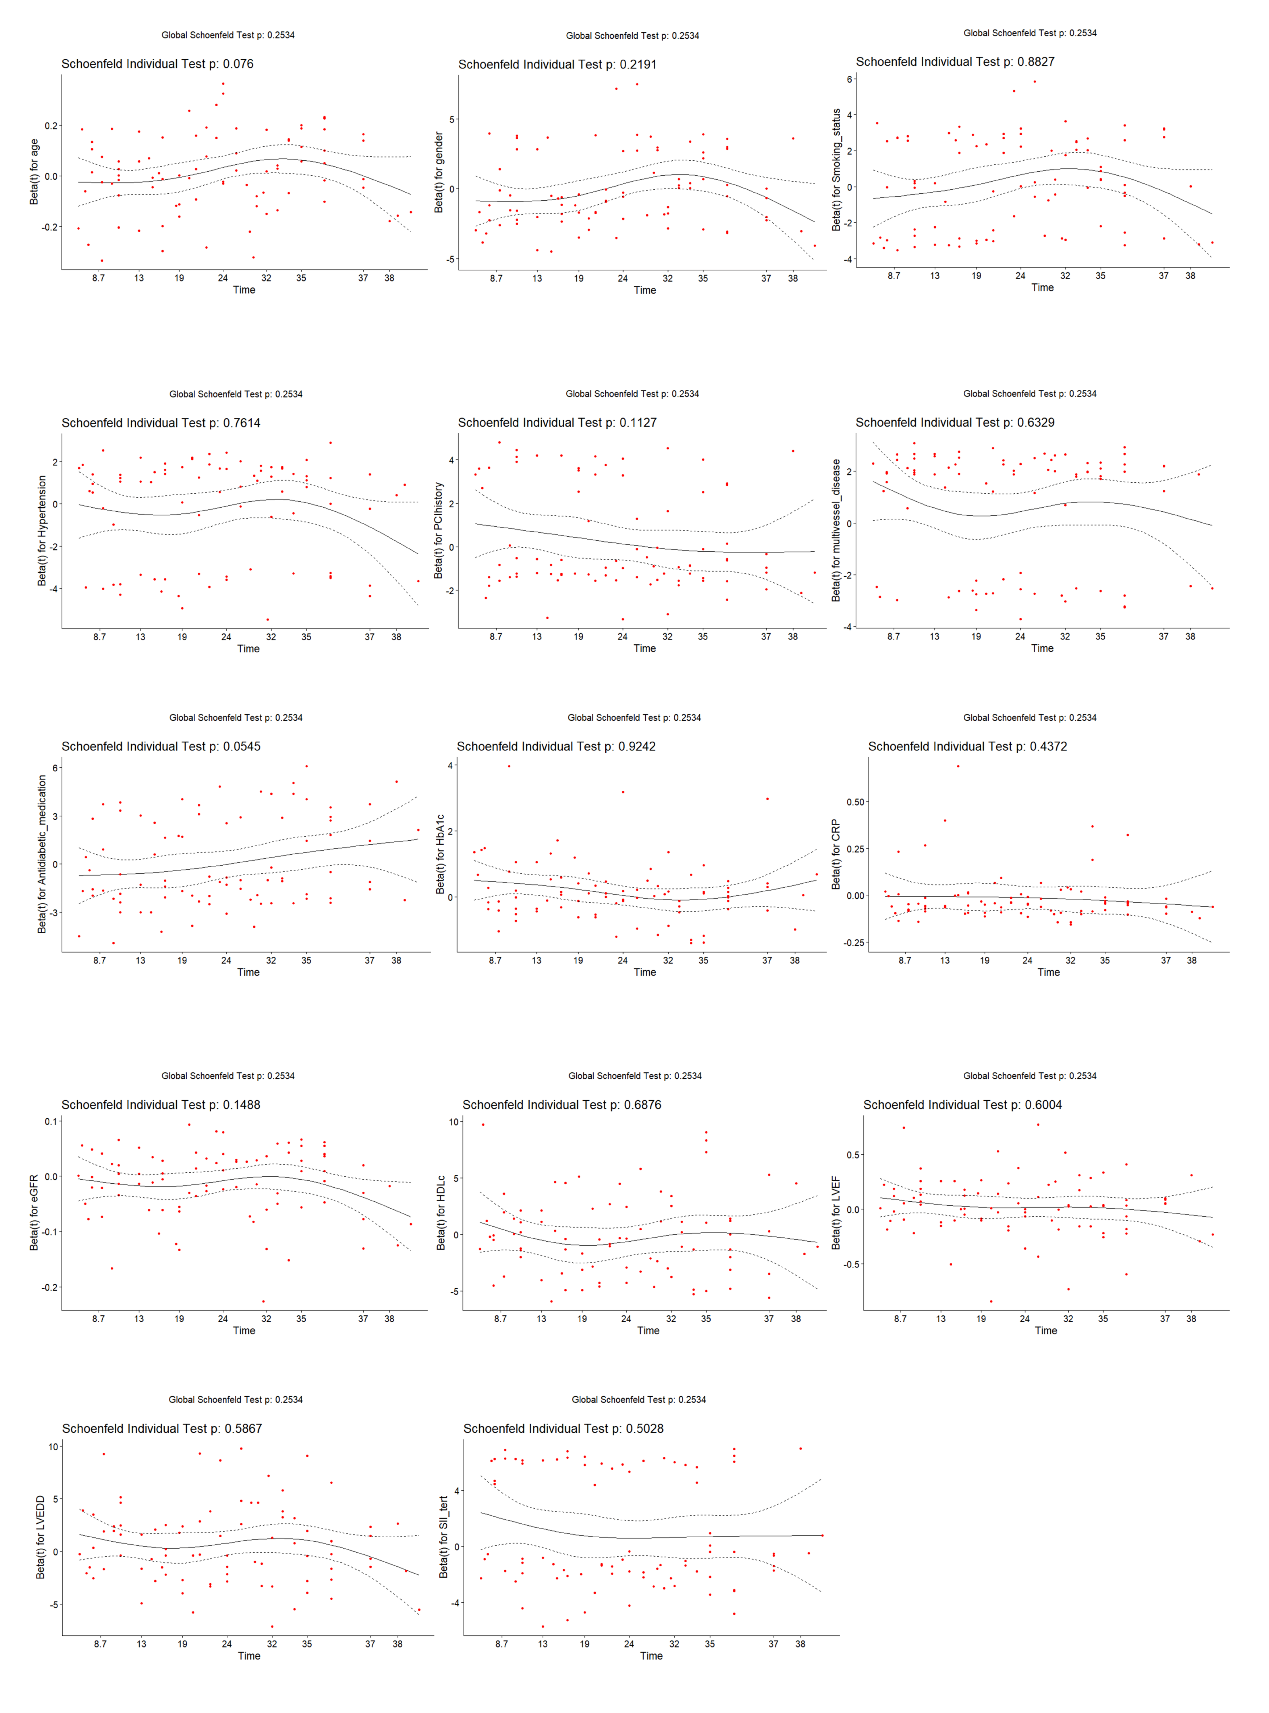


Supplementary Figure 3 Schoenfeld residual plots for Cox model covariates


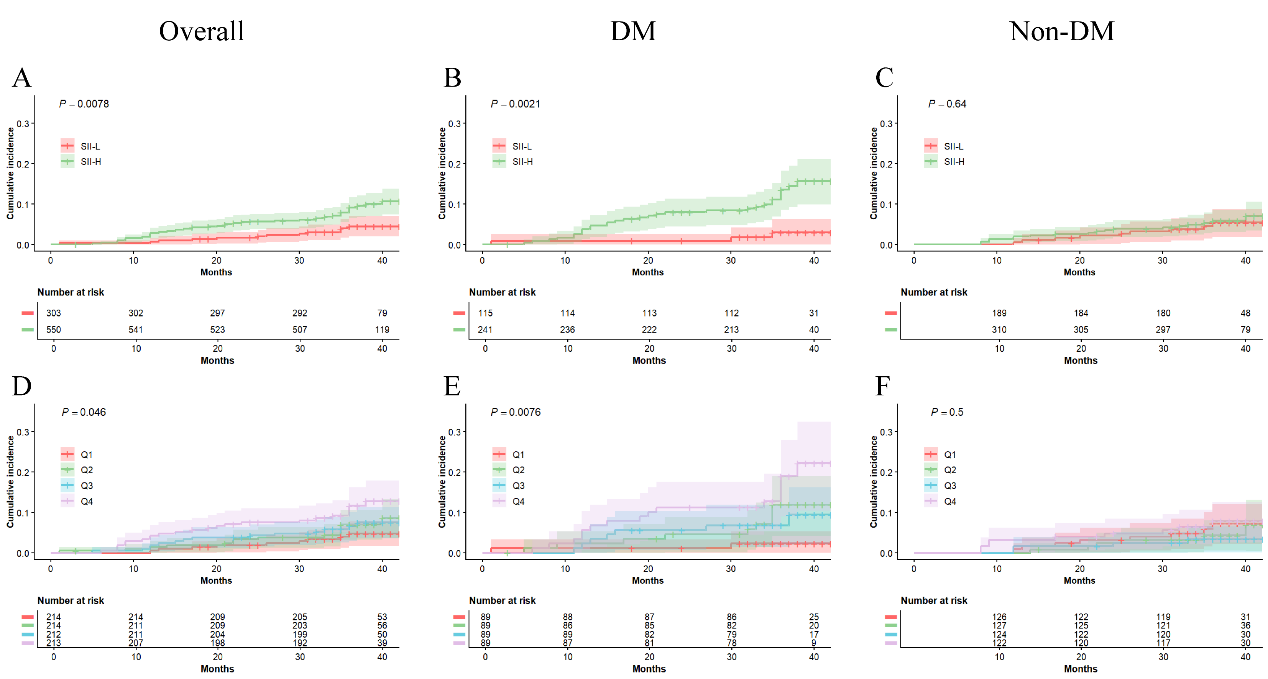


Supplementary Figure 4 Kaplan-Meier survival curves for ischemia-driven revascularization stratified by the cutoff point of SII and SII quartiles in the whole cohort (A, D), in the diabetic cohort (B, E), and in the nondiabetic cohort (C, F). SII: systemic immune-inflammation


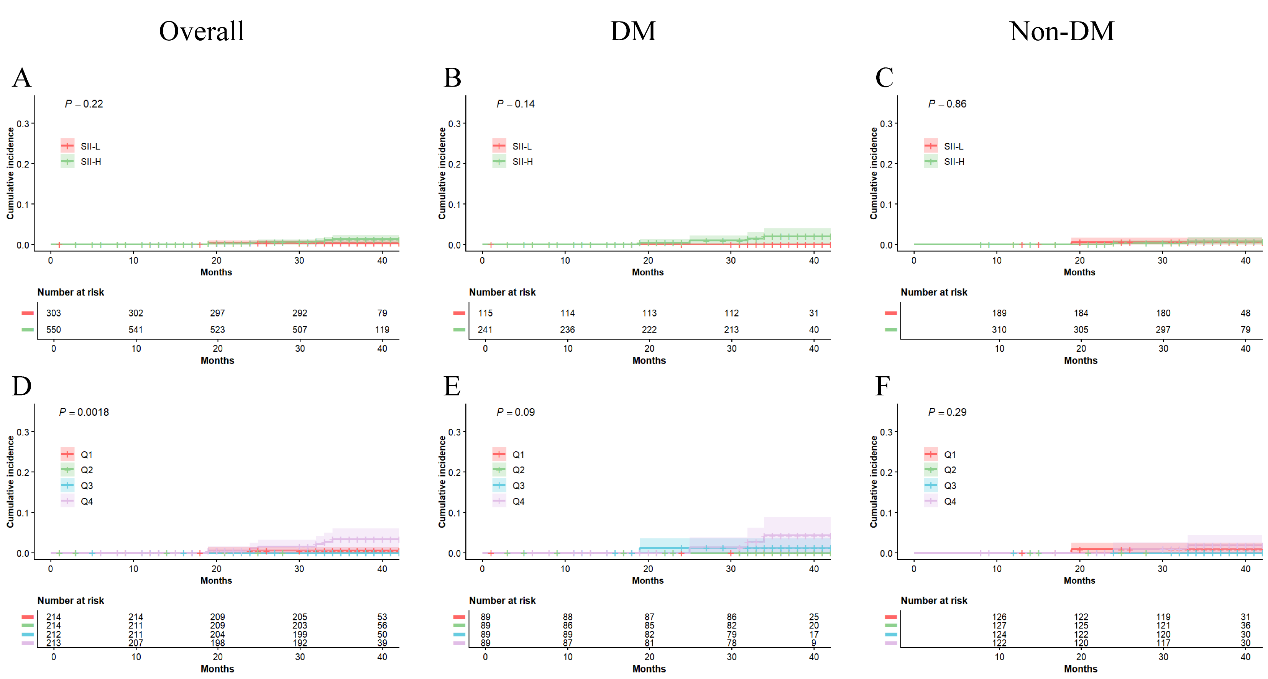


Supplementary Figure 5 Kaplan-Meier survival curves for nonfatal MI stratified by the cutoff point of SII and SII quartiles in the whole cohort (A, D), in the diabetic cohort (B, E), and in the nondiabetic cohort (C, F). SII: systemic immune-inflammation, MI: myocardial infarction


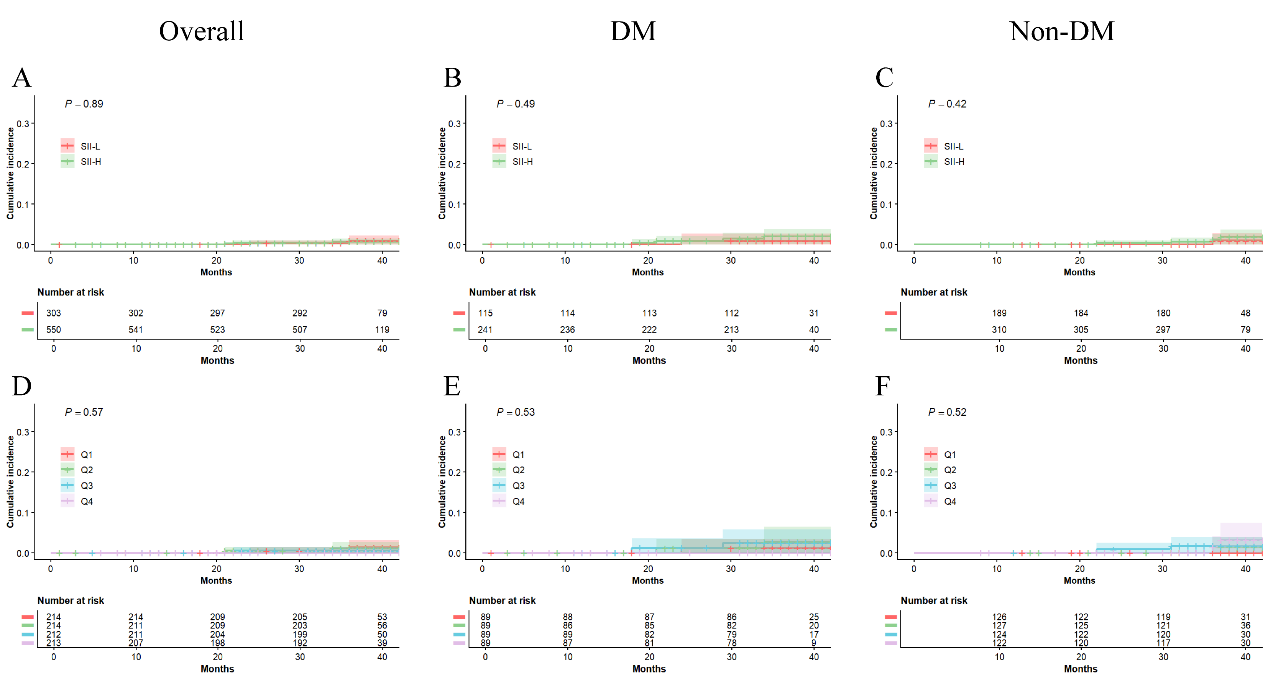


Supplementary Figure 6 Kaplan-Meier survival curves for heart failure stratified by the cutoff point of SII and SII quartiles in the whole cohort (A, D), in the diabetic cohort (B, E), and in the nondiabetic cohort (C, F). SII: systemic immune-inflammation


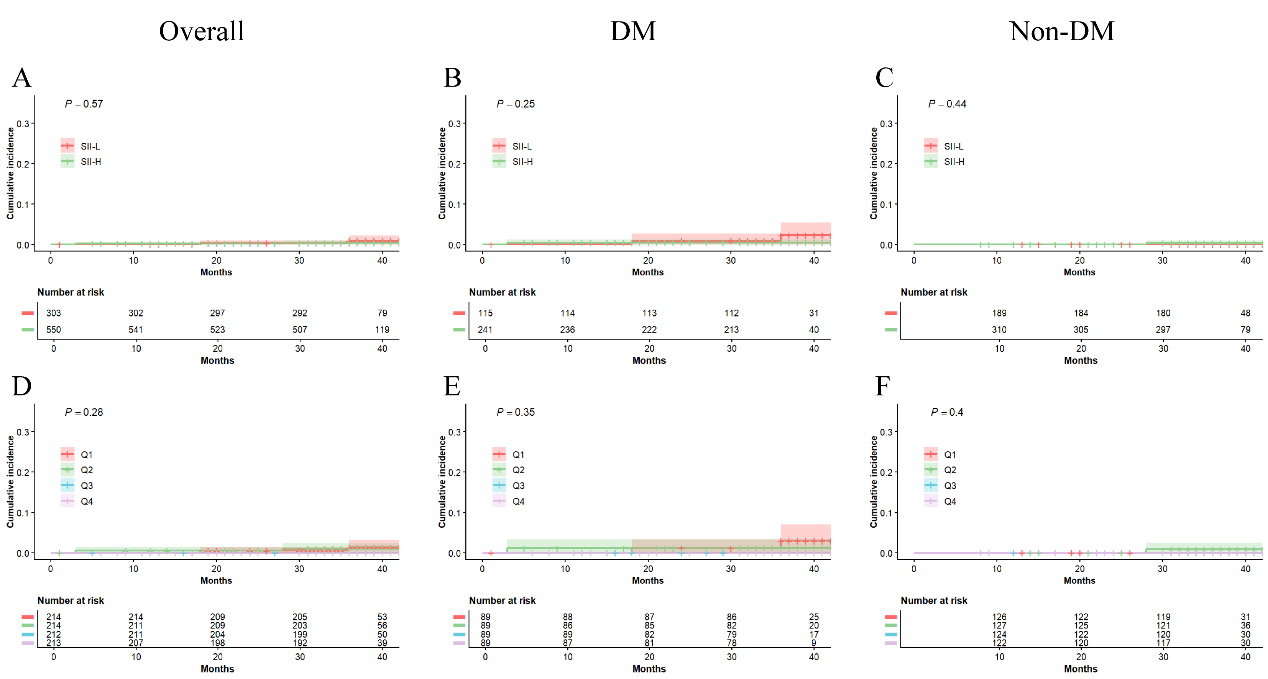


Supplementary Figure 7 Kaplan-Meier survival curves for cardiovascular death stratified by the cutoff point of SII and SII quartiles in the whole cohort (A, D), in the diabetic cohort (B, E), and in the nondiabetic cohort (C, F). SII: systemic immune-inflammation


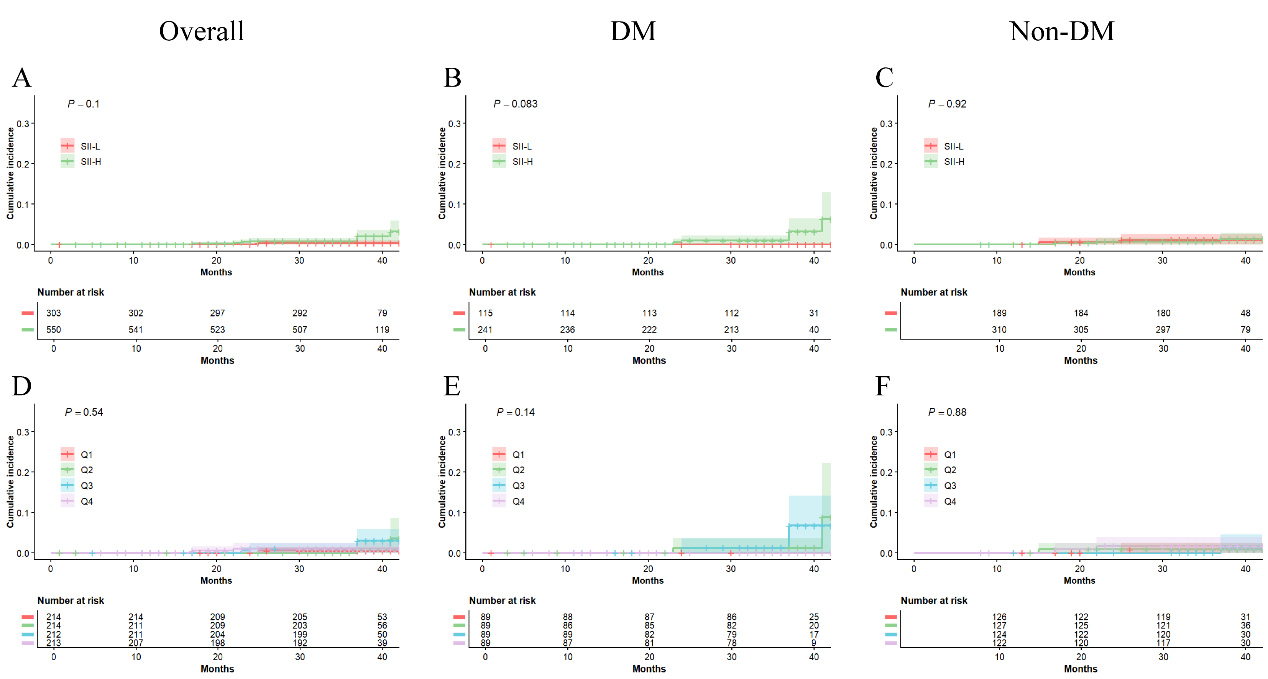


Supplementary Figure 8 Kaplan-Meier survival curves for stroke stratified by the cutoff point of SII and SII quartiles in the whole cohort (A, D), in the diabetic cohort (B, E), and in the nondiabetic cohort (C, F). SII: systemic immune-inflammation

Supplementary Table 1 Univariable analysis for the MACCEs in the whole cohort

| Variable | HR (95%CI) | *P*-value |
| --- | --- | --- |
| Age, year | 1.03 (1.00-1.06) | 0.043 |
| Male | 1.35 (0.81-2.27) | 0.252 |
| Systolic blood pressure, mmHg | 1.02 (1.00-1.03) | 0.015 |
| Diastolic blood pressure, mmHg | 1.01 (0.99-1.03) | 0.288 |
| Smoking status | 1.12 (0.69-1.82) | 0.641 |
| Hypertension | 1.06 (0.64-1.77) | 0.823 |
| Diabetes mellitus | 2.23 (1.38-3.59) | 0.001 |
| Dyslipidemia | 0.75 (0.45-1.28) | 0.295 |
| History of PCI | 1.61 (0.97-2.65) | 0.063 |
| HbA1c, % | 1.25 (1.07-1.46) | 0.005 |
| FPG, mmol/L | 1.22 (1.09-1.37) | 0.001 |
| TG, mmol/L | 1.15 (0.93-1.41) | 0.190 |
| TC, mmol/L | 0.86 (0.68-1.07) | 0.178 |
| HDL-C, mmol/L | 0.60 (0.26-1.38) | 0.231 |
| LDL-C, mmol/L | 0.83 (0.63-1.09) | 0.182 |
| Creatinine, umol/L | 1.01 (1.00-1.02) | 0.003 |
| eGFR, ml/min/1.73m² | 0.99 (0.97-1.00) | 0.013 |
| CRP, mg/L | 0.99 (0.94-1.04) | 0.801 |
| LVEF, % | 0.99 (0.95-1.04) | 0.713 |
| LAD, mm | 1.40 (0.75-2.60) | 0.293 |
| LVESD, mm | 1.89 (1.05-3.39) | 0.163 |
| LVEDD, mm | 1.48 (0.85-2.58) | 0.033 |
| Multivessel coronary artery disease | 2.08 (1.26-3.45) | 0.004 |
| ACEI/ARB/ARNI | 1.11 (0.69-1.77) | 0.675 |
| β-blocker | 1.30 (0.81-2.09) | 0.284 |
| Aspirin | 0.88 (0.42-1.83) | 0.725 |
| Antidiabetic medication | 1.70 (1.07-2.72) | 0.026 |

PCI: percutaneous coronary intervention, Hb1Ac: glycated hemoglobin, FPG: Fasting plasma glucose, TG: Triglycerides, TC: Total cholesterol, LDL-c: Low-density lipoprotein cholesterol, HDL-c: High-density lipoprotein cholesterol, CRP: C-reactive protein, eGFR: estimated-glomerular filtration rate, LVEF: left ventricular ejection fraction, LAD: Left atrial diameter, LVEDD: left ventricular end-diastolic dimension, LVESD: Left ventricular end-systolic diameter, ACEI/ARB/ARNI: Angiotensin converting enzyme inhibitors/Angiotensin receptor blocker/Angiotensin receptor-neprilysin inhibitor

Supplementary Table 2 Multicollinearity analysis of covariates

| Variable | VIF |
| --- | --- |
| Age | 1.401 |
| Gender | 1.469 |
| Smoking status | 1.320 |
| Hypertension | 1.050 |
| History of PCI | 1.111 |
| Multivessel disease | 1.043 |
| Antidiabetic medication | 1.709 |
| HbA1c | 1.766 |
| CRP | 1.031 |
| eGFR | 1.369 |
| HDL-c | 1.186 |
| LVEF | 1.208 |
| LVEDD | 1.285 |

PCI: percutaneous coronary intervention, Hb1Ac: glycated hemoglobin, CRP: C-reactive protein, eGFR: estimated-glomerular filtration rate, HDL-C: high-density lipoprotein cholesterol, LVEF: left ventricular ejection fraction, LVEDD: left ventricular end-diastolic dimension

Supplementary Table 3 Baseline characteristics for diabetic or non-diabetic patients with different SII levels

| Clinical characteristics | Total | Lower SII and non-DM | Higher SII and non-DM | Lower SII and DM | Higher SII and DM | *P*-value |
| --- | --- | --- | --- | --- | --- | --- |
| N = 853 | N = 189 | N = 310 | N = 115 | N = 239 |  |
| Age, years | 65 (58-71) | 65 (58-71) | 64 (57-70) | 64 (58-71) | 66 (59-71) | 0.079 |
| Male, n (%) | 557 (65.30) | 113 (59.79) | 210 (67.74) | 70 (60.87) | 164 (68.62) | 0.138 |
| Heart rate, bpm | 74 (67-81) | 73 (65-79) | 74 (67-81) | 74 (68-83) | 75 (70-80.50) | 0.202 |
| Systolic blood pressure, mmHg | 136 (123-147) | 133 (120-146) | 136 (123-145.75) | 137 (120-147.75) | 138 (126-150) | 0.051 |
| Diastolic blood pressure, mmHg | 80 (73-89) | 80 (73-88) | 82 (74-90) | 78 (70.25-85.00) | 80 (72-89) | 0.038 |
| BMI, kg/m² | 24.56 (22.68-26.67) | 24.13 (22.25-26.15) | 24.51 (22.85-26.66) | 24.77 (22.73-26.55) | 24.91 (22.92-27.29) | 0.022 |
| Smoking status, n (%) | 295(34.58) | 61 (32.28) | 113 (36.45) | 33 (28.70) | 88 (36.82) | 0.360 |
| Drinking status, n (%) | 179(20.98) | 40 (21.16) | 75 (24.19) | 15 (13.04) | 49 (20.50) | 0.096 |
| Comorbidities | | | | | | |
| Hypertension, n (%) | 588 (68.93) | 114 (60.32) | 208 (67.10) | 80 (69.57) | 186 (77.82) | 0.001 |
| Diabetes mellitus, n (%) | 354 (41.50) | 0 (0.00) | 0 (0.00) | 115 (100.00) | 239 (100.00) | < 0.001 |
| Stroke, n (%) | 139 (16.30) | 19 (10.05) | 51 (16.45) | 15 (13.04) | 54 (22.59) | 0.004 |
| Dyslipidemia, n (%) | 270 (31.65) | 59 (31.22) | 108 (34.84) | 32 (27.83) | 71 (29.71) | 0.446 |
| History of PCI, n (%) | 211 (24.74) | 43 (22.75) | 61 (19.68) | 35 (30.43) | 72 (30.13) | 0.015 |
| Laboratory data | | | | | | |
| Leukocyte count, 109/L | 5.90 (4.90-7.00) | 5.40 (4.50-6.20) | 6.10 (5.10-7.20) | 5.50 (4.55-6.45) | 6.50 (5.40-7.70) | < 0.001 |
| Neutrophil, count 109/L | 3.40 (2.80-4.20) | 2.70 (2.30-3.20) | 3.70 (3.10-4.57) | 3.00 (2.45-3.45) | 4.00 (3.40-4.95) | < 0.001 |
| Lymphocyte count, 109/L | 1.70 (1.40-2.20) | 1.90 (1.60-2.40) | 1.60 (1.30-1.98) | 2.00 (1.60-2.40) | 1.70 (1.40-2.10) | < 0.001 |
| Platelet count, 109/L | 197.00 (164.00-231.00) | 170.00 (144.00-204.00) | 211.00 (180.00-245.75) | 166.00 (135.00-195.50) | 208.00 (177.00-253.50) | < 0.001 |
| SII | 378.00 (274.18-532.00) | 245.00 (197.00-280.93) | 468.04 (379.03-594.18) | 246.38 (206.67-284.87) | 473.05 (392.79-653.42) | < 0.001 |
| CRP, mg/L | 2.90 (2.00-4.00) | 2.60 (1.80-3.80) | 3.00 (2.00-4.10) | 2.90 (2.05-3.60) | 3.10 (2.20-4.50) | 0.006 |
| HbA1c, % | 6.00 (5.60-6.80) | 5.70(5.50-5.90) | 5.70 (5.40-6.00) | 7.00 (6.50-8.00) | 7.00 (6.60-7.70) | < 0.001 |
| FPG, mmol/L | 4.98 (4.54-5.83) | 4.71 (4.44-4.97) | 4.71 (4.39-5.03) | 5.83 (5.01-7.01) | 6.12 (5.34-7.39) | < 0.001 |
| TG, mmol/L | 1.28 (0.96-1.83) | 1.15 (0.87-1.68) | 1.24 (0.94-1.73) | 1.33 (0.93-1.96) | 1.41 (1.05-2.19) | < 0.001 |
| TC, mmol/L | 3.90 (3.24-4.67) | 4.00 (3.30-4.91) | 3.97 (3.33-4.74) | 3.85 (3.33-4.44) | 3.73 (3.12-4.56) | 0.048 |
| HDL-C, mmol/L | 1.06 (0.90-1.27) | 1.10 (0.94-1.39) | 1.08 (0.91-1.28) | 1.11 (0.93-1.26) | 0.97 (0.85-1.14) | < 0.001 |
| LDL-C, mmol/L | 2.11 (1.59-2.80) | 2.26 (1.63-2.93) | 2.16 (1.62-2.83) | 2.08 (1.54-2.58) | 1.97 (1.48-2.71) | 0.074 |
| Creatinine, umol/L | 66.00 (56.00-76.00) | 64.00 (56.00-74.00) | 68.00 (59.00-78.00) | 64.00 (54.00-74.00) | 65.00 (54.50-75.00) | 0.022 |
| eGFR, ml/min/1.73m² | 98.93 (88.13-108.12) | 98.15 (89.35-108.12) | 98.36 (87.41-107.77) | 99.63 (87.28-106.98) | 100.08 (88.43-109.25) | 0.805 |
| Echocardiographic data | | | | | | |
| LVEF, % | 59.90 (58.00-61.48) | 60.20 (58.60-61.50) | 60.00 (58.40-61.74) | 60.00 (58.20-61.10) | 59.10 (57.30-61.20) | 0.006 |
| LAD, cm | 3.75 (3.60-4.00) | 3.70 (3.53,3.90) | 3.70 (3.57-4.00) | 3.80 (3.60-4.08) | 3.81 (3.60-4.10) | < 0.001 |
| LVESD, cm | 3.35 (3.20-3.52) | 3.34 (3.19,3.47) | 3.34 (3.20-3.50) | 3.35 (3.21-3.50) | 3.39 (3.20-3.58) | 0.037 |
| LVEDD, cm | 4.94 (4.76-5.16) | 4.91 (4.75,5.10) | 4.95 (4.75-5.12) | 4.92 (4.76-5.10) | 5.00 (4.80-5.20) | 0.079 |
| Angiographic data | | | | | | |
| Multivessel coronary artery disease, n (%) | 446 (52.29) | 85 (44.97) | 150 (48.39) | 67 (58.26) | 144 (60.25) | 0.003 |
| Left anterior descending, n (%) | 661 (77.49) | 144 (76.19) | 245 (79.03) | 83 (72.17) | 189 (79.08) | 0.421 |
| Left circumflex, n (%) | 389 (45.6) | 70 (37.04) | 124 (40.00) | 61 (53.04) | 134 (56.07) | < 0.001 |
| Right coronary artery, n (%) | 413 (48.42) | 80 (42.33) | 136 (43.87) | 60 (52.17) | 137 (57.32) | 0.003 |
| Medications | | | | | | |
| ACEI/ARB/ARNI, n (%) | 396 (46.42) | 67 (35.45) | 142 (45.81) | 61 (53.04) | 126 (52.72) | 0.002 |
| β-blocker, n (%) | 449 (52.64) | 91 (48.15) | 166 (53.55) | 55 (47.83) | 137 (57.32) | 0.187 |
| Statin, n (%) | 849 (99.53) | 185 (97.88) | 310 (100.00) | 115 (100.00) | 239 (100.00) | 0.005 |
| Aspirin, n (%) | 760 (89.10) | 169 (89.42) | 279 (90.00) | 97 (84.35) | 215 (89.96) | < 0.001 |
| Antidiabetic medication, n (%) | 310 (36.34) | 0 (0.00) | 0 (0.00) | 106 (92.17) | 204 (85.36) | < 0.001 |

CCS: Chronic coronary syndrome, SII: Systemic immune-inflammation index, BMI: Body mass index, PCI: Percutaneous coronary intervention, CRP: C-reactive protein, FPG: Fasting plasma glucose, HbA1c: Glycated hemoglobin, TG: Triglycerides, TC: Total cholesterol, LDL-c: Low-density lipoprotein cholesterol, HDL-c: High-density lipoprotein cholesterol, eGFR: Estimated glomerular filtration rate; LVEF: Left ventricular ejection fraction, LAD: Left atrial diameter, LVEDD: Left ventricular end-diastolic diameter, LVESD: Left ventricular end-systolic diameter, ACEI/ARB/ARNI: Angiotensin converting enzyme inhibitors/Angiotensin receptor blocker/Angiotensin receptor-neprilysin inhibitor

Supplementary Table 4 Supplementary analysis: Multivariate-adjusted Cox regression models of SII for clinical outcomes in overall, diabetic, and non-diabetic CCS patients

| Group | Model 1 | | Model 2 | | Model 3 | |
| --- | --- | --- | --- | --- | --- | --- |
| HR (95%CI) | *P*-Value | HR (95%CI) | *P*-value | HR (95%CI) | *P*-value |
| Whole cohort | | | | | | |
| Log SII | 1.67 (1.12-2.50) | 0.012 | 1.64 (1.10-2.46) | 0.016 | 1.70 (1.10-2.64) | 0.018 |
| SII-L | Ref |  | Ref |  | Ref |  |
| SII-H | 2.16 (1.28-3.63) | 0.004 | 2.14 (1.27-3.60) | 0.004 | 2.01 (1.18-3.40) | 0.010 |
| SII1 | Ref |  | Ref |  | Ref |  |
| SII2 | 1.35 (0.69-2.64) | 0.378 | 1.34 (0.69-2.62) | 0.389 | 1.25 (0.63-2.46) | 0.526 |
| SII3 | 1.31 (0.67-2.58) | 0.433 | 1.29 (0.65-2.53) | 0.468 | 1.20 (0.60-2.39) | 0.602 |
| SII4 | 2.24 (1.21-4.15) | 0.010 | 2.15 (1.16-3.98) | 0.015 | 2.05 (1.09-3.84) | 0.026 |
| Diabetic cohort | | | | | | |
| Log SII | 1.91 (1.19-3.06) | 0.007 | 1.83 (1.16-2.90) | 0.010 | 2.22 (1.32-3.73) | 0.003 |
| SII-L | Ref |  | Ref |  | Ref |  |
| SII-H | 3.94 (1.68-9.26) | 0.002 | 3.74 (1.59-8.79) | 0.002 | 3.91 (1.64-9.28) | 0.002 |
| SII1 | Ref |  | Ref |  | Ref |  |
| SII2 | 3.03 (1.09-8.43) | 0.033 | 2.94 (1.06-8.17) | 0.039 | 2.62 (0.93-7.38) | 0.068 |
| SII3 | 2.87 (1.02-8.07) | 0.045 | 2.77 (0.98-7.81) | 0.054 | 2.56 (0.89-7.35) | 0.081 |
| SII4 | 4.16 (1.54-11.22) | 0.005 | 4.02 (1.49-10.83) | 0.006 | 4.40 (1.61-12.04) | 0.004 |
| Nondiabetic cohort | | | | | | |
| Log SII | 1.22 (0.66-2.26) | 0.533 | 1.19 (0.63-2.27) | 0.589 | 1.17 (0.61-2.27) | 0.643 |
| SII-L | Ref |  | Ref |  | Ref |  |
| SII-H | 1.30 (0.68-2.52) | 0.428 | 1.32 (0.68-2.56) | 0.404 | 1.29 (0.66-2.52) | 0.454 |
| SII1 | Ref |  | Ref |  | Ref |  |
| SII2 | 0.88 (0.36-2.18) | 0.790 | 0.87 (0.36-2.15) | 0.771 | 0.77 (0.31-1.95) | 0.587 |
| SII3 | 0.70 (0.27-1.83) | 0.466 | 0.68 (0.26-1.80) | 0.441 | 0.66 (0.25-1.74) | 0.399 |
| SII4 | 1.54 (0.69-3.44) | 0.287 | 1.47 (0.66-3.29) | 0.343 | 1.38 (0.61-3.13) | 0.434 |

Model 1: Unadjusted model.

Model 2: Adjusted for age and sex.

Model 3: Adjusted for age, sex, hypertension, multivessel disease, HbA1c, CRP, eGFR, LVEF.

Hb1Ac: glycated hemoglobin, CRP: C-reactive protein, eGFR: estimated-glomerular filtration rate, LVEF: left ventricular ejection fraction, SII: systemic immune-inflammation index, HR: hazard ratio, CI: confidence interval

Supplementary Table 5 Supplementary analysis: Association between risks of composite endpoints and groups based on SII levels and diabetes status

| Group | Model 1 | | Model 2 | | Model 3 | |
| --- | --- | --- | --- | --- | --- | --- |
| HR (95%CI) | *P*-value | HR (95%CI) | *P*-value | HR (95%CI) | *P*-value |
| SII and Diabetes status | | | | | | |
| DM/SII-H | Ref |  | Ref |  | Ref |  |
| DM/SII-L | 0.27(0.11-0.63) | 0.002 | 0.28(0.12-0.66) | 0.003 | 0.28(0.12-0.67) | 0.004 |
| Non-DM/SII-H | 0.42(0.26-0.69) | 0.001 | 0.45(0.27-0.73) | 0.001 | 0.52(0.28-0.97) | 0.041 |
| Non-DM/SII-L | 0.33(0.17-0.62) | 0.001 | 0.34(0.18-0.65) | 0.001 | 0.41(0.19-0.88) | 0.022 |

Model 1: Unadjusted model.

Model 2: Adjusted for age and sex.

Model 3: Adjusted for age, sex, hypertension, multivessel disease, HbA1c, CRP, eGFR, LVEF.

Hb1Ac: glycated hemoglobin, CRP: C-reactive protein, eGFR: estimated-glomerular filtration rate, LVEF: left ventricular ejection fraction, SII: systemic immune-inflammation index, HR: hazard ratio, CI: confidence interval

Supplementary Table 6 Multivariate-adjusted Cox regression models of SII for secondary endpoints in overall CCS patients, with analyses stratified by SII levels, and their combination of SII and diabetes

| Group | Model 1 | | Model 2 | | Model 3 | |
| --- | --- | --- | --- | --- | --- | --- |
| HR (95%CI) | *P*-value | HR (95%CI) | *P*-value | HR (95%CI) | *P*-value |
| Ischemia-driven-revascularization | | | | | | |
| Whole cohort | | | | | | |
| Log SII | 1.87 (1.17-2.98) | 0.009 | 1.88 (1.18-3.01) | 0.008 | 1.86 (1.12-3.10) | 0.017 |
| SII-L | Ref |  | Ref |  | Ref |  |
| SII-H | 2.30 (1.22-4.34) | 0.010 | 2.32 (1.23-4.38) | 0.009 | 2.19 (1.15-4.17) | 0.018 |
| SII and Diabetes status | | | | | | |
| DM/SII-H | Ref |  | Ref |  | Ref |  |
| DM/SII-L | 0.19 (0.06-0.62) | 0.006 | 0.19 (0.06-0.63) | 0.007 | 0.20 (0.06-0.68) | 0.010 |
| Non-DM/SII-H | 0.43 (0.24-0.77) | 0.005 | 0.45 (0.25-0.80) | 0.007 | 0.24 (0.09-0.67) | 0.006 |
| Non-DM/SII-L | 0.35 (0.17-0.73) | 0.006 | 0.35 (0.17-0.73) | 0.006 | 0.20 (0.07-0.61) | 0.005 |
| Nonfatal MI | | | | | | |
| Whole cohort | | | | | | |
| Log SII | 3.96 (1.25-12.57) | 0.020 | 3.52 (1.16-10.66) | 0.026 | 6.48 (1.19-35.18) | 0.030 |
| SII-L | Ref |  | Ref |  | Ref |  |
| SII-H | 3.50(0.42-29.06) | 0.246 | 2.32 (1.40-27.69) | 0.266 | 3.05 (0.32-29.16) | 0.333 |
| SII and Diabetes status | | | | | | |
| DM/SII-H | Ref |  | Ref |  | Ref |  |
| DM/SII-L | - | - | - | - | - | - |
| Non-DM/SII-H | 0.37 (0.07-2.00) | 0.246 | 0.39 (0.07-2.13) | 0.277 | 0.15 (0.01-2.99) | 0.215 |
| Non-DM/SII-L | 0.29 (0.33-2.60) | 0.270 | 0.32 (0.04-2.86) | 0.307 | 0.14 (0.01-3.23) | 0.218 |
| Heart failure | | | | | | |
| Whole cohort | | | | | | |
| Log SII | 0.50 (0.01-2.52) | 0.405 | 0.44 (0.07-2.94) | 0.400 | 0.41 (0.05-3.61) | 0.423 |
| SII-L | Ref |  | Ref |  | Ref |  |
| SII-H | 0.88 (0.15-5.26) | 0.887 | 0.93 (0.15-5.61) | 0.937 | 0.90 (0.12-6.70) | 0.922 |
| SII and Diabetes status | | | | | | |
| DM/SII-H | Ref |  | Ref |  | Ref |  |
| DM/SII-L | 0.90 (0.08-9.95) | 0.932 | 1.03 (0.09-11.35) | 0.984 | 0.45 (0.02–9.02) | 0.602 |
| Non-DM/SII-H | 0.35 (0.03-3.86) | 0.391 | 0.40 (0.04-4.44) | 0.456 | - | - |
| Non-DM/SII-L | 0.57 (0.05-6.28) | 0.646 | 0.55 (0.05–6.14) | 0.627 | - | - |
| Cardiovascular death | | | | | | |
| Whole cohort | | | | | | |
| Log SII | 0.36 (0.07-1.78) | 0.210 | 0.32 (0.07-1.43) | 0.136 | 0.25 (0.04-1.54) | 0.134 |
| SII-L | Ref |  | Ref |  | Ref |  |
| SII-H | 0.57 (0.08-4.08) | 0.579 | 0.53 (0.07-3.75) | 0.522 | 0.55 (0.05-5.65) | 0.613 |
| SII and Diabetes status | | | | | | |
| DM/SII-H | Ref |  | Ref |  | Ref |  |
| DM/SII-L | 3.74 (0.34-41.37) | 0.282 | 4.17 (0.38-46.19) | 0.244 | 4.44 (0.62-31.91) | 0.138 |
| Non-DM/SII-H | 0.71 (0.04-11.36) | 0.808 | 0.74 (0.05-11.87) | 0.832 | 0.43 (0.04-4.16) | 0.467 |
| Non-DM/SII-L | - | - | - | - | - | - |
| Stroke | | | | | | |
| Whole cohort | | | | | | |
| Log SII | 1.35 (1.12-2.50) | 0.012 | 1.23 (0.33-4.62) | 0.760 | 1.34 (0.29-6.13) | 0.703 |
| SII-L | Ref |  | Ref |  | Ref |  |
| SII-H | 4.78 (0.60-38.27) | 0.010 | 4.63 (0.58-37.18) | 0.149 | 3.84 (0.46-31.78) | 0.212 |
| SII and Diabetes status | | | | | | |
| DM/SII-H | Ref |  | Ref |  | Ref |  |
| DM/SII-L | - | - | - | - | - | - |
| Non-DM/SII-H | 0.40 (0.09–1.66) | 0.205 | 0.41 (0.10–1.73) | 0.227 | - | - |
| Non-DM/SII-L | 0.21 (0.02–1.82) | 0.158 | 0.22 (0.03–1.930 | 0.174 | - | - |

Model 1: Unadjusted model.

Model 2: Adjusted for age and sex.

Model 3: Adjusted for age, sex, smoking status, hypertension, history of PCI, multivessel coronary artery disease, antidiabetic medication, HbA1c, CRP, eGFR, HDL-C, LVEF, and LVEDD.

PCI: percutaneous coronary intervention, Hb1Ac: glycated hemoglobin, CRP: C-reactive protein, eGFR: estimated-glomerular filtration rate, HDL-C: high-density lipoprotein cholesterol, LVEF: left ventricular ejection fraction, LVEDD: left ventricular end-diastolic dimension, SII: systemic immune-inflammation index, HR: hazard ratio, CI: confidence interval

Supplementary Table 7 Multivariate-adjusted Cox regression models of SII for hard and soft endpoints in overall CCS patients, with analyses stratified by SII levels, and their combination of SII and diabetes

| Group | Model 1 | | Model 2 | | Model 3 | |
| --- | --- | --- | --- | --- | --- | --- |
| HR (95%CI) | *P*-value | HR (95%CI) | *P*-value | HR (95%CI) | *P*-value |
| Hard endpoints | | | | | | |
| Whole cohort | | | | | | |
| Log SII | 1.26 (0.59-2.73) | 0.551 | 1.16 (0.53-2.55) | 0.709 | 1.16 (0.48-2.78) | 0.740 |
| SII-L | Ref |  | Ref |  | Ref |  |
| SII-H | 1.86 (0.74-4.66) | 0.185 | 1.81 (0.72-4.53) | 0.208 | 1.63 (0.63-4.22) | 0.316 |
| SII and Diabetes status | | | | | | |
| DM/SII-H | Ref |  | Ref |  | Ref |  |
| DM/SII-L | 0.45 (0.13-1.61) | 0.221 | 0.50 (0.14-1.76) | 0.278 | 0.56 (0.15-2.10) | 0.388 |
| Non-DM/SII-H | 0.41 (0.16-1.03) | 0.058 | 0.43 (0.17-1.10) | 0.078 | 0.77 (0.13-4.43) | 0.768 |
| Non-DM/SII-L | 0.28 (0.08-0.99) | 0.049 | 0.30 (0.08-1.06) | 0.061 | 0.54 (0.08-3.72) | 0.530 |
| Soft endpoints | | | | | | |
| Whole cohort | | | | | | |
| Log SII | 1.87 (1.17-2.98) | 0.009 | 1.88 (1.18-3.01) | 0.008 | 1.86 (1.12-3.1) | 0.017 |
| SII-L | Ref |  | Ref |  | Ref |  |
| SII-H | 2.30 (1.22-4.34) | 0.010 | 2.32 (1.23-4.38) | 0.009 | 2.19 (1.15-4.17) | 0.018 |
| SII and Diabetes status | | | | | | |
| DM/SII-H | Ref |  | Ref |  | Ref |  |
| DM/SII-L | 0.19 (0.06-0.62) | 0.006 | 0.19 (0.06-0.63) | 0.007 | 0.20 (0.06-0.68) | 0.010 |
| Non-DM/SII-H | 0.43 (0.24-0.77) | 0.005 | 0.45 (0.25-0.80) | 0.007 | 0.24 (0.09-0.67) | 0.006 |
| Non-DM/SII-L | 0.35 (0.17-0.73) | 0.006 | 0.35 (0.17-0.75) | 0.006 | 0.20 (0.07-0.61) | 0.005 |

Model 1: Unadjusted model.

Model 2: Adjusted for age and sex.

Model 3: Adjusted for age, sex, smoking status, hypertension, history of PCI, multivessel coronary artery disease, antidiabetic medication, HbA1c, CRP, eGFR, HDL-C, LVEF, and LVEDD.

PCI: percutaneous coronary intervention, Hb1Ac: glycated hemoglobin, CRP: C-reactive protein, eGFR: estimated-glomerular filtration rate, HDL-C: high-density lipoprotein cholesterol, LVEF: left ventricular ejection fraction, LVEDD: left ventricular end-diastolic dimension, SII: systemic immune-inflammation index, HR: hazard ratio, CI: confidence interval
